# Supplementary material for: Antimicrobial Abietane-Type Diterpenoids from Plectranthus punctatus
Source: Molecules. 2017 Nov 7;22(11):1919. doi: 10.3390/molecules22111919 (PMC6150224; doi:10.3390/molecules22111919)
Supplement: Supplementary file 1 [file molecules-22-01919-s001.pdf]

# Supporting Information

## Antibiotic abietane-type diterpenoids from *Plectranthus punctatus*

Negera Abdissa, Marcel Frese, and Norbert Sewald

### Table of contents

| Contents                                                                                                   | Page |
|------------------------------------------------------------------------------------------------------------|------|
| <b>Spectroscopic data for 6<math>\beta</math>, 7<math>\beta</math>-dihydroxy-12-methylroyleanone (1)</b>   |      |
| Figure S1: $^1\text{H}$ NMR spectrum of 6 $\beta$ , 7 $\beta$ -dihydroxy-12-methylroyleanone (1)           | S2   |
| Figure S2: $^{13}\text{C}$ NMR spectrum of 6 $\beta$ , 7 $\beta$ -dihydroxy-12-methylroyleanone (1)        | S2   |
| Figure S3: $^{13}\text{C}$ DEPT NMR spectrum of 6 $\beta$ , 7 $\beta$ -dihydroxy-12-methylroyleanone (1)   | S3   |
| Figure S4: COSY spectrum of 6 $\beta$ , 7 $\beta$ -dihydroxy-12-methylroyleanone (1)                       | S3   |
| Figure S5: HMQC spectrum of 6 $\beta$ , 7 $\beta$ -dihydroxy-12-methylroyleanone (1)                       | S4   |
| Figure S6: HMBC spectrum of 6 $\beta$ , 7 $\beta$ -dihydroxy-12-methylroyleanone (1)                       | S4   |
| Figure S7: NOESY spectrum of 6 $\beta$ , 7 $\beta$ -dihydroxy-12-methylroyleanone (1)                      | S5   |
| Figure S8: HRESIMS spectra of 6 $\beta$ , 7 $\beta$ -dihydroxy-12-methylroyleanone (1)                     | S5   |
| <b>Spectroscopic data for 6<math>\beta</math>-acetoxy-6<math>\alpha</math>-methoxy-7-oxoroyleanone (2)</b> |      |
| Figure S9: $^1\text{H}$ NMR spectrum of 6 $\beta$ -acetoxy-6 $\alpha$ -methoxy-7-oxoroyleanone (2)         | S6   |
| Figure S10: $^{13}\text{C}$ NMR spectrum of 6 $\beta$ -acetoxy-6 $\alpha$ -methoxy-7-oxoroyleanone (2)     | S6   |
| Figure S11: COSY spectrum of 6 $\beta$ -acetoxy-6 $\alpha$ -methoxy-7-oxoroyleanone (2)                    | S7   |
| Figure S12: HMQC spectrum of 6 $\beta$ -acetoxy-6 $\alpha$ -methoxy-7-oxoroyleanone (2)                    | S7   |
| Figure S13: HMBC spectrum of 6 $\beta$ -acetoxy-6 $\alpha$ -methoxy-7-oxoroyleanone (2)                    | S8   |
| Figure S14: HRESIMS spectra of 6 $\beta$ -acetoxy-6 $\alpha$ -methoxy-7-oxoroyleanone (2)                  | S8   |
| <b>Spectroscopic data for 8<math>\alpha</math>,9<math>\alpha</math>-epoxy-6-deoxycoleon U (3)</b>          |      |
| Figure S15: $^1\text{H}$ NMR spectrum of 8 $\alpha$ ,9 $\alpha$ -epoxy-6-deoxycoleon U (3)                 | S9   |
| Figure S16: $^{13}\text{C}$ NMR spectrum of 8 $\alpha$ ,9 $\alpha$ -epoxy-6-deoxycoleon U (3)              | S9   |
| Figure S17: COSY spectrum of 8 $\alpha$ ,9 $\alpha$ -epoxy-6-deoxycoleon U (3)                             | S10  |
| Figure S18: NOESY spectrum of 8 $\alpha$ ,9 $\alpha$ -epoxy-6-deoxycoleon U (3)                            | S10  |
| Figure S19: HMQC spectrum of 8 $\alpha$ ,9 $\alpha$ -epoxy-6-deoxycoleon U (3)                             | S11  |
| Figure S20: HMBC spectrum of 8 $\alpha$ ,9 $\alpha$ -epoxy-6-deoxycoleon U (3)                             | S11  |
| Figure S21: HRESIMS spectra of 8 $\alpha$ ,9 $\alpha$ -epoxy-6-deoxycoleon U (3)                           | S12  |
| Figure S22: IR spectra of 8 $\alpha$ ,9 $\alpha$ -epoxy-6-deoxycoleon U (3)                                | S12  |
| <b>Spectroscopic data for 6,12-dihydroxysapriparaquinone (4)</b>                                           |      |
| Figure S23: $^1\text{H}$ NMR spectrum of 6,12-dihydroxysapriparaquinone (4)                                | S13  |
| Figure S24: $^{13}\text{C}$ NMR spectrum of 6,12-dihydroxysapriparaquinone (4)                             | S13  |
| Figure S25: $^{13}\text{C}$ DEPT NMR spectrum of 6,12-dihydroxysapriparaquinone (4)                        | S14  |
| Figure S26: COSY spectrum of 6,12-dihydroxysapriparaquinone (4)                                            | S14  |
| Figure S27: HMQC spectrum of 6,12-dihydroxysapriparaquinone (4)                                            | S15  |
| Figure S28: HMBC spectrum of 6,12-dihydroxysapriparaquinone (4)                                            | S15  |
| Figure S29: HRESIMS spectra 6,12-dihydroxysapriparaquinone (4)                                             | S16  |

## Spectroscopic data for 6 $\beta$ , 7 $\beta$ -dihydroxy-12-methyloyleanone (1)

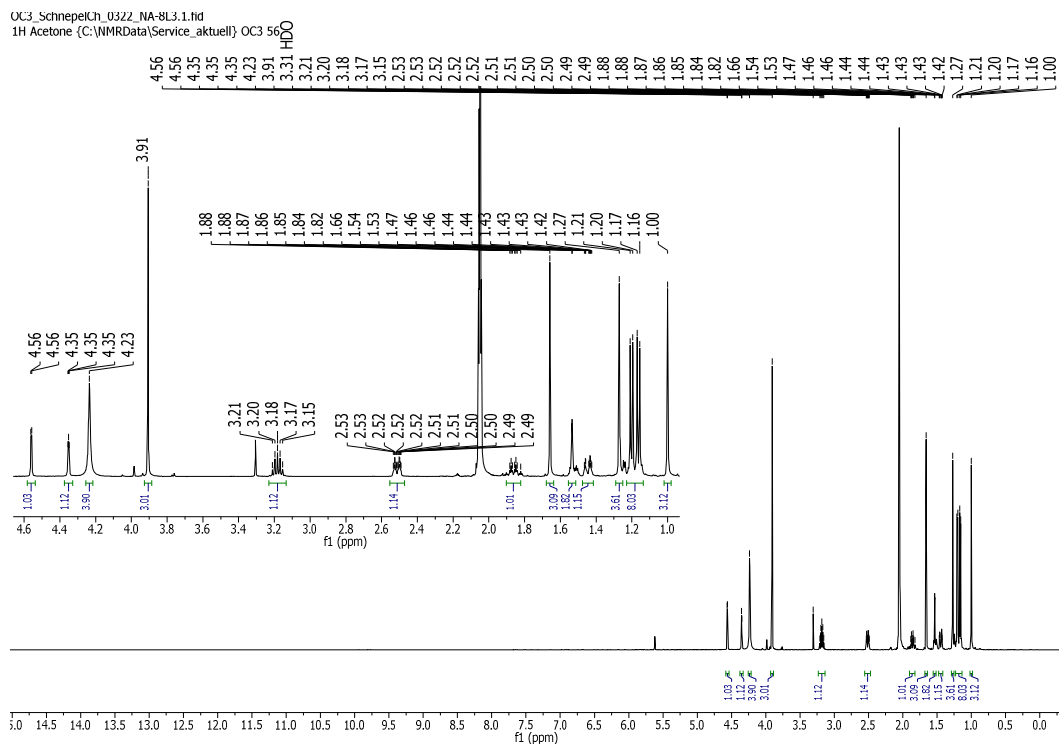

**Figure S1.** The  $^1\text{H}$  NMR spectrum of 6 $\beta$ , 7 $\beta$ -dihydroxy-12-methyloyleanone (**1**) observed at 500 MHz in acetone- $d_6$  at 25 °C. Assignments are given in Table 1.

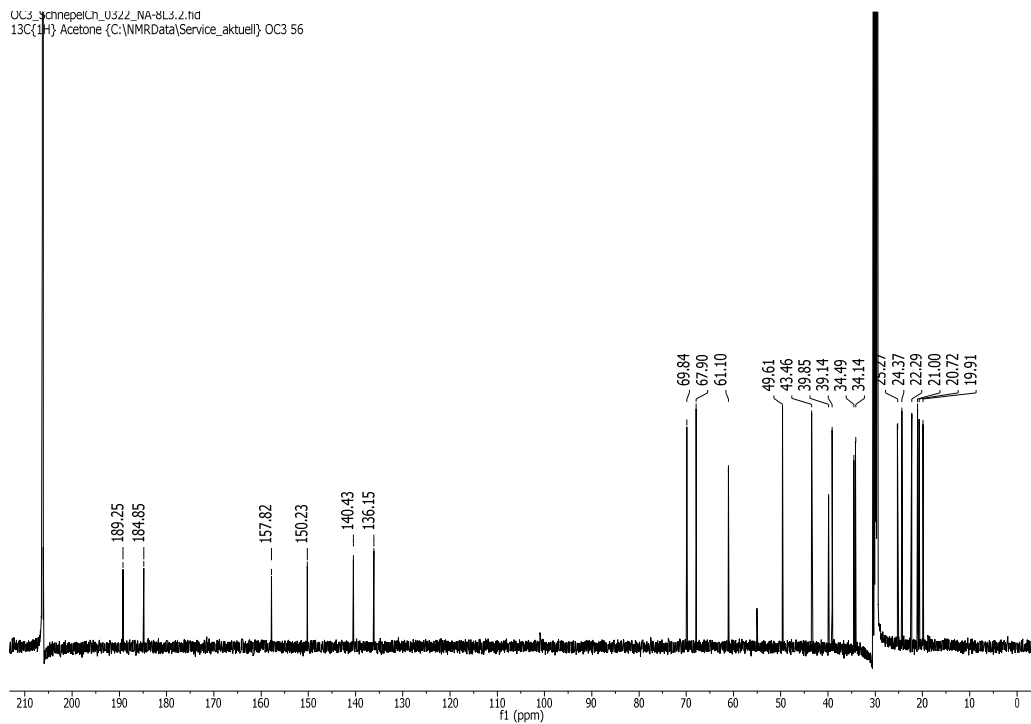

**Figure S2.** The  $^{13}\text{C}$  NMR spectrum of 6 $\beta$ , 7 $\beta$ -dihydroxy-12-methyloyleanone (**1**) observed at 125 MHz in acetone- $d_6$  solution at 25 °C. Assignments are given in Table 1.

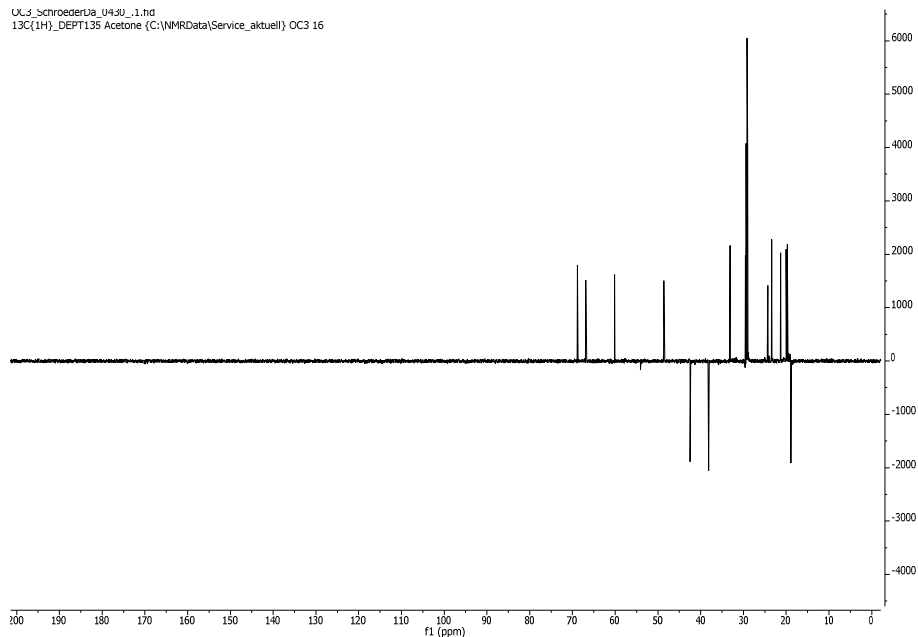

**Figure S3.** The  $^{13}\text{C}$  DEPT NMR spectrum of 6 $\beta$ , 7 $\beta$ -dihydroxy-12-methylroyleanone (**1**) observed at 125 MHz in acetone- $d_6$  solution at 25 °C.

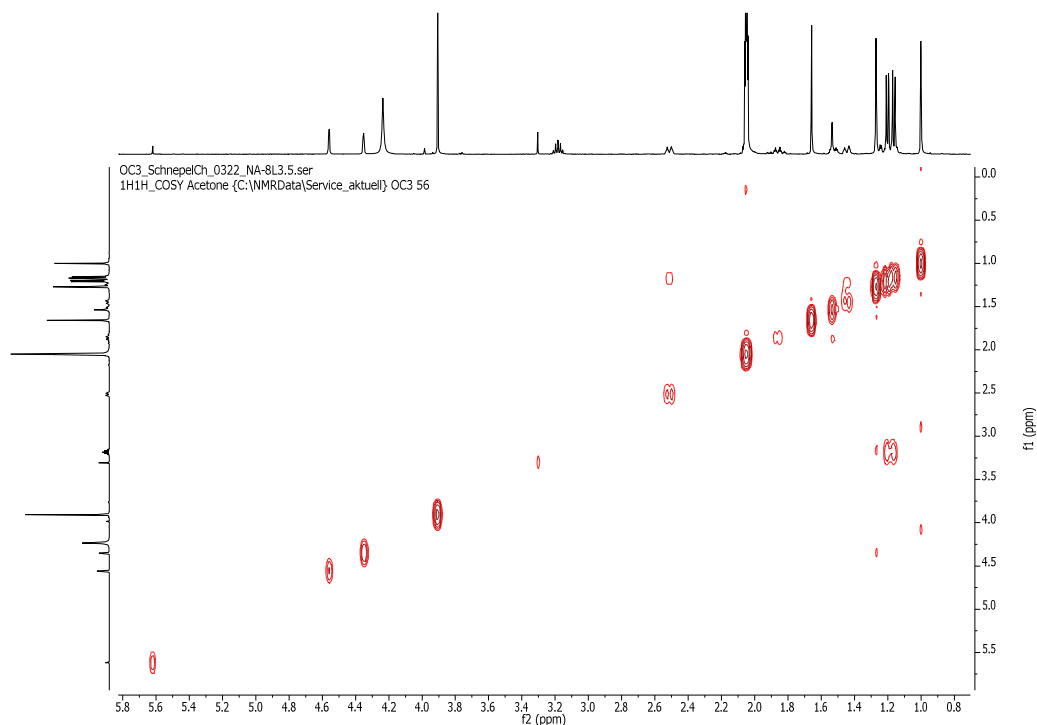

**Figure S4.** The COSY spectrum of 6 $\beta$ , 7 $\beta$ -dihydroxy-12-methylroyleanone (**1**) observed at 500 MHz in acetone- $d_6$  solution at 25 °C.

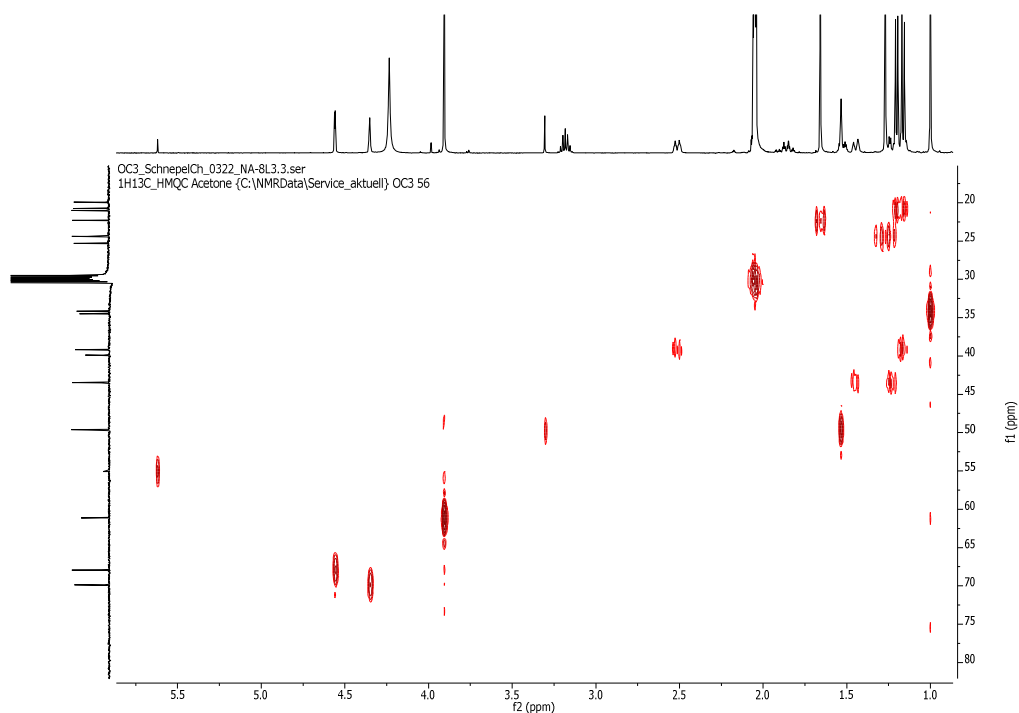

**Figure S5.** The HSQC spectrum of 6 $\beta$ , 7 $\beta$ -dihydroxy-12-methyloyleanone (**1**) observed at 500 and 125 MHz in acetone- $d_6$  solution at 25 °C.

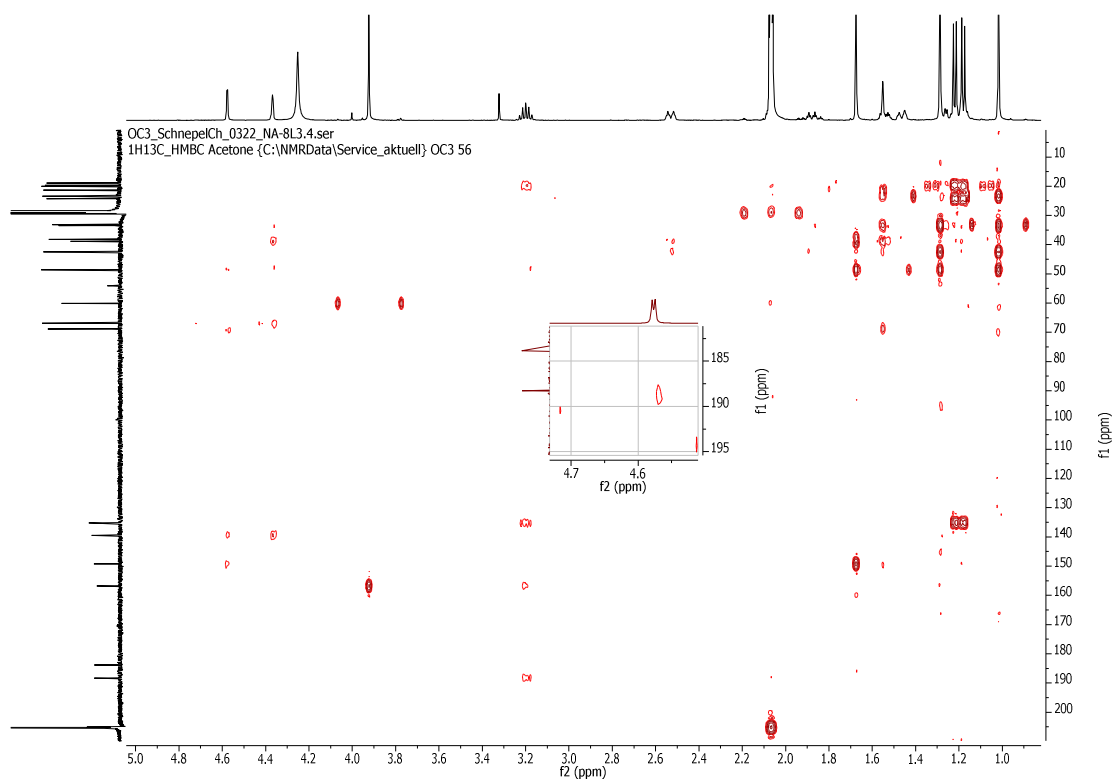

**Figure S6.** The HMBC spectrum of 6 $\beta$ , 7 $\beta$ -dihydroxy-12-methyloyleanone (**1**) observed at 500 and 125 MHz in acetone- $d_6$  solution at 25 °C.

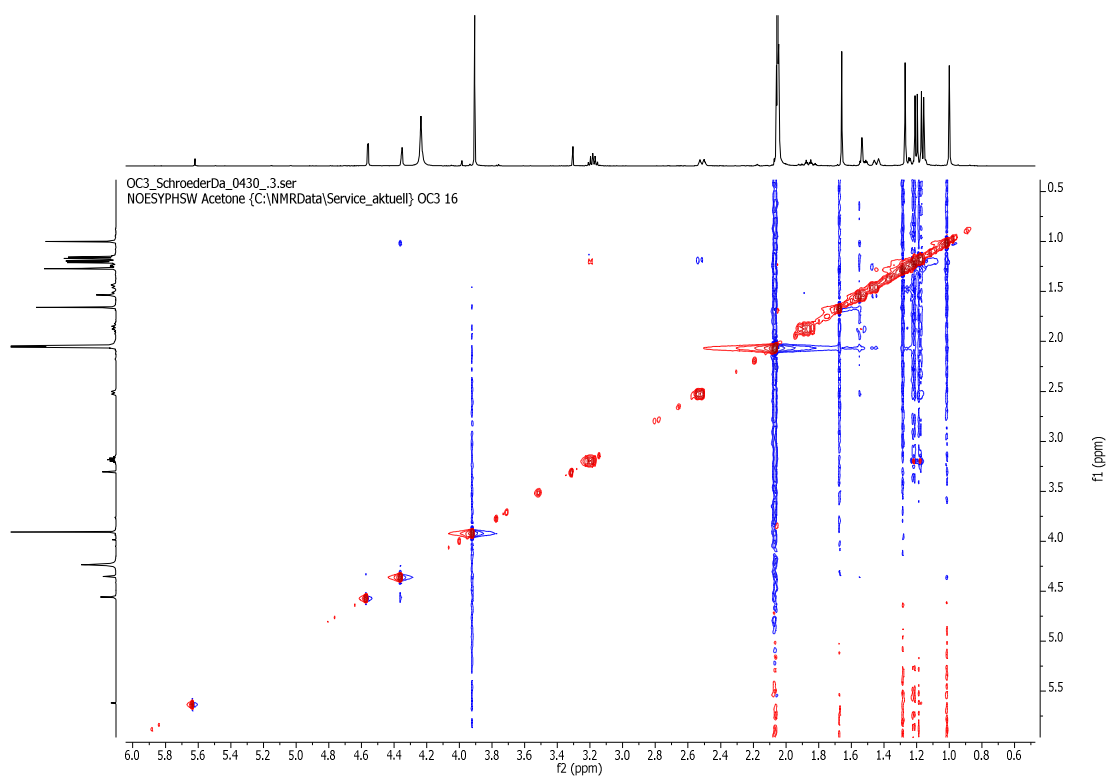

**Figure S7.** The NOESY spectrum of 6 $\beta$ , 7 $\beta$ -dihydroxy-12-methyloyleanone (**1**) observed at 500 MHz in acetone- $d_6$  solution at 25 °C.

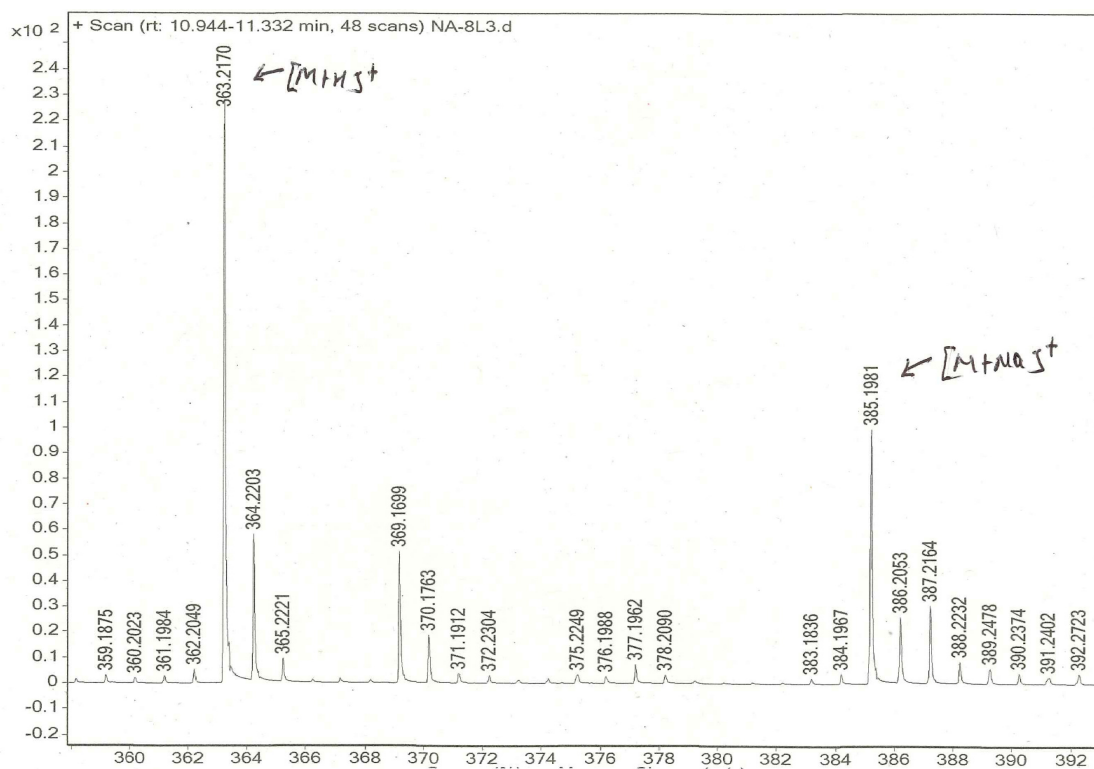

**Figure S8.** The HRESIMS of 6 $\beta$ , 7 $\beta$ -dihydroxy-12-methyloyleanone (**1**).

## Spectroscopic data for 6 $\beta$ -acetoxy-6 $\alpha$ -methoxy-7-oxoroleanone (2)

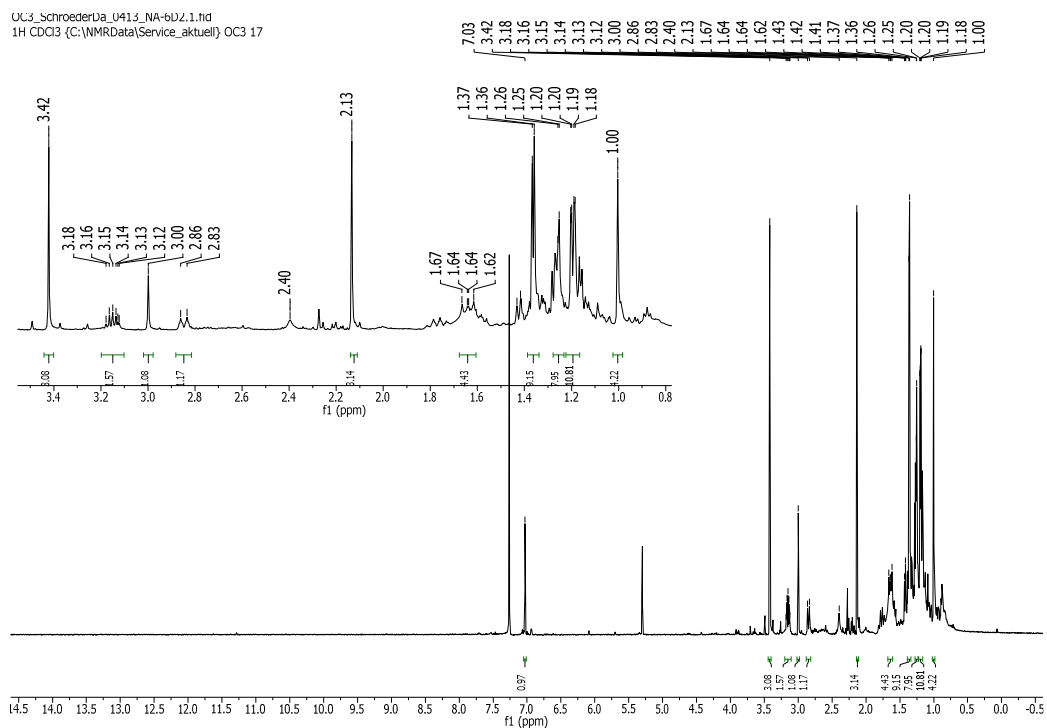

**Figure S9.** The  $^1\text{H}$  NMR of 6 $\beta$ -acetoxy-6 $\alpha$ -methoxy-7-oxoroleanone (**2**) observed at 500 MHz in  $\text{CDCl}_3$  solution at 25  $^\circ\text{C}$ . Assignments are given in Table 1.

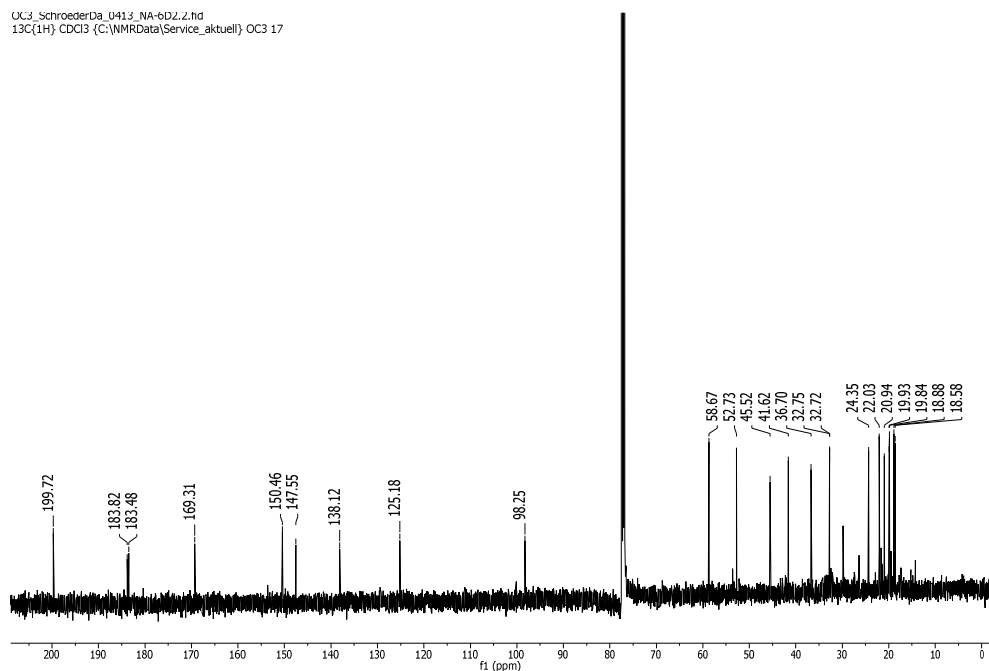

**Figure S10.** The  $^{13}\text{C}$  NMR spectrum of 6 $\beta$ -acetoxy-6 $\alpha$ -methoxy-7-oxoroleanone (**2**) observed at 125 MHz in  $\text{CDCl}_3$  solution at 25  $^\circ\text{C}$ . Assignments are given in Table 1.

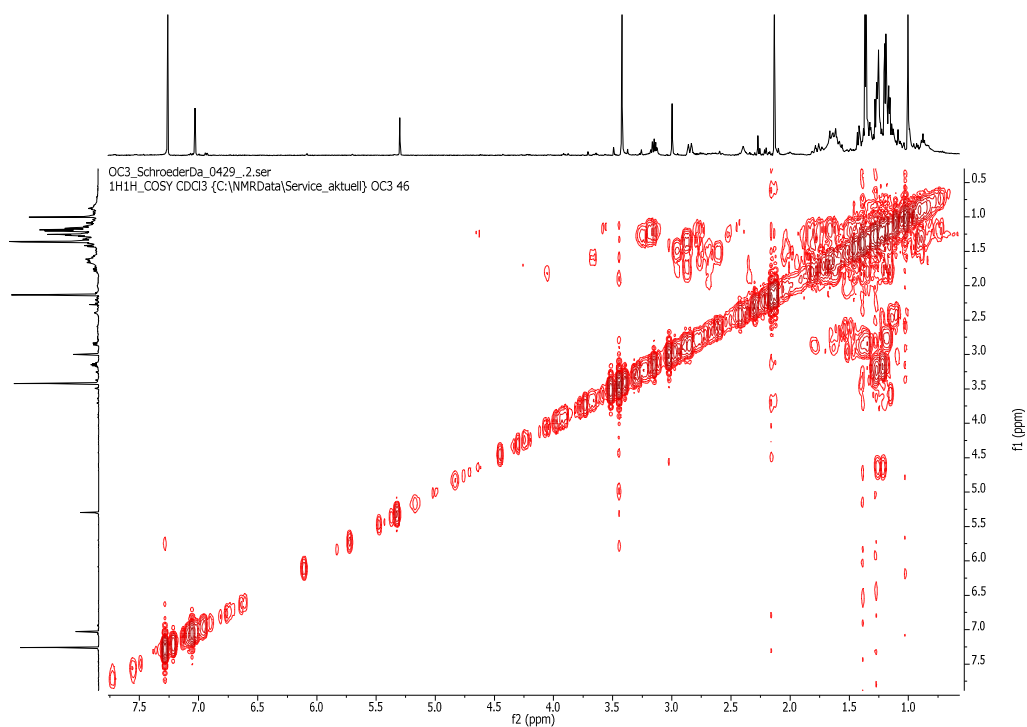

**Figure S11.** The COSY spectrum of 6 $\beta$ -acetoxy-6 $\alpha$ -methoxy-7-oxoroleanone (**2**) observed at 500 MHz in CDCl<sub>3</sub> solution at 25 °C.

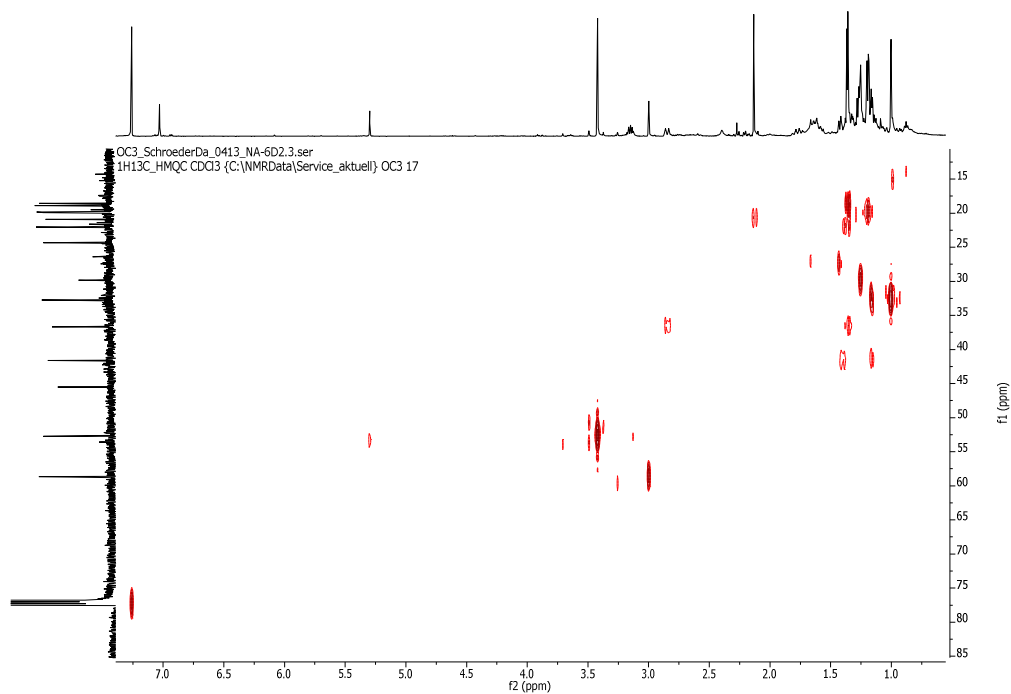

**Figure S12.** The HSQC spectrum of 6 $\beta$ -acetoxy-6 $\alpha$ -methoxy-7-oxoroleanone (**2**) observed at 500 and 125 MHz in CDCl<sub>3</sub> solution at 25 °C.

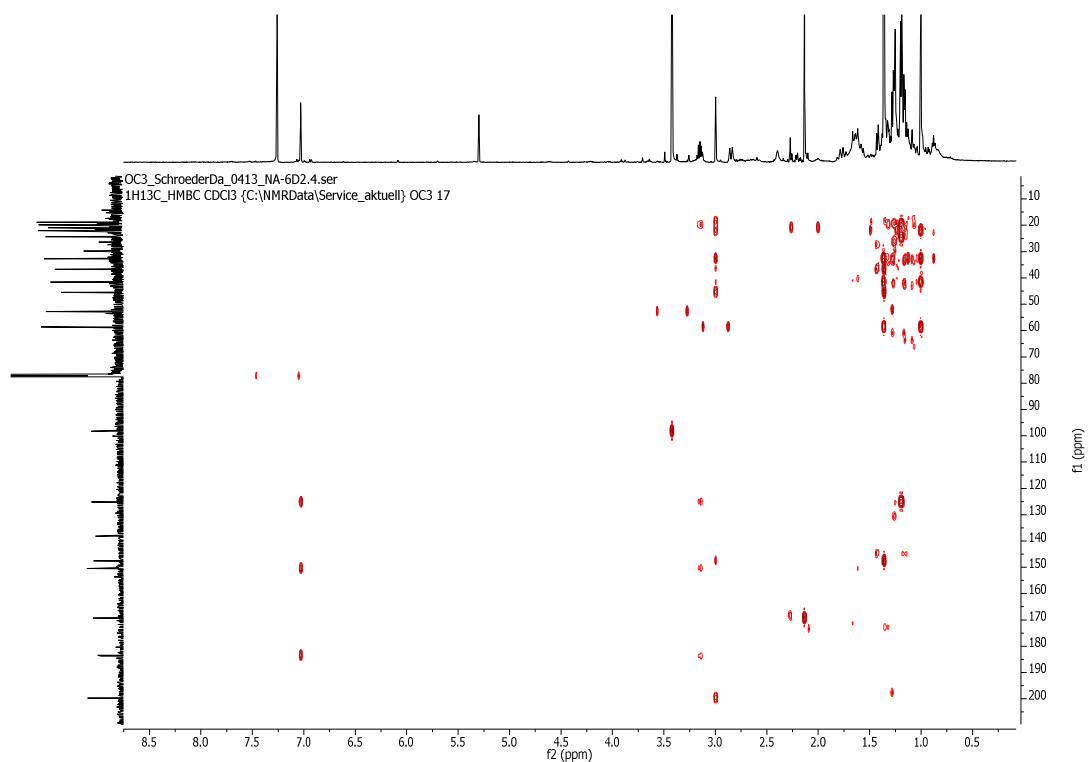

**Figure S13.** The HMBC spectrum of 6 $\beta$ -acetoxy-6 $\alpha$ -methoxy-7-oxoroleanone (**2**) observed at 500 and 125 MHz in CDCl<sub>3</sub> solution at 25 °C.

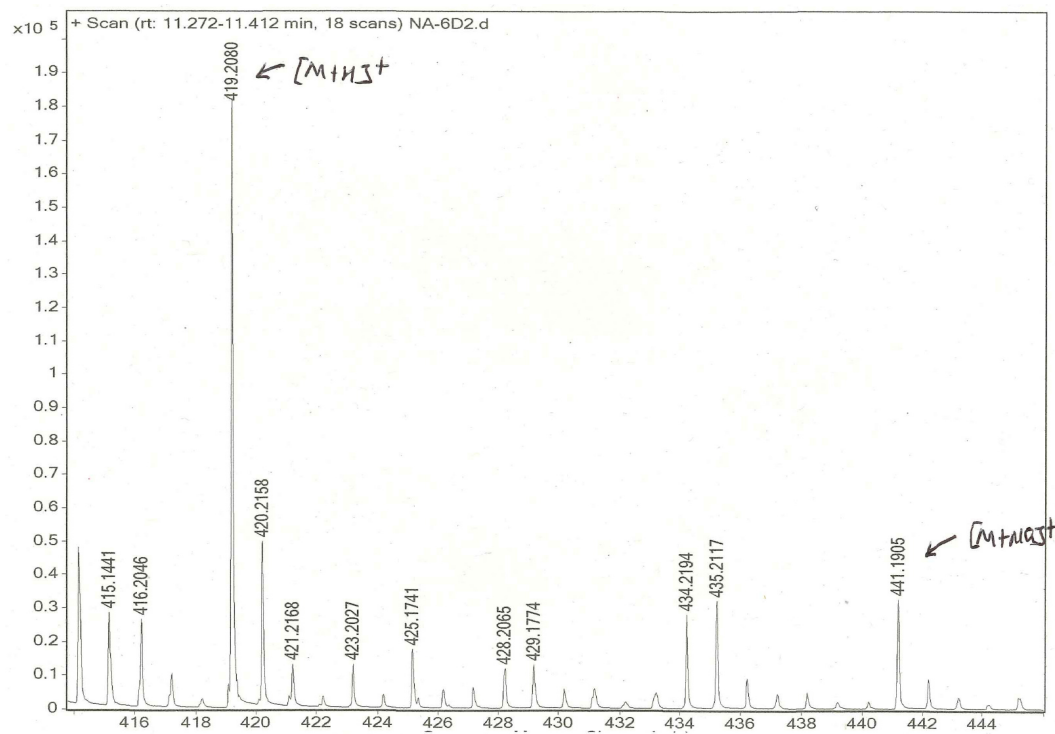

**Figure S14.** The HRESIMS of 6 $\beta$ -acetoxy-6 $\alpha$ -methoxy-7-oxoroleanone (**2**)

## Spectroscopic data for 8 $\alpha$ ,9 $\alpha$ -epoxy-6-deoxycoleon U (3)

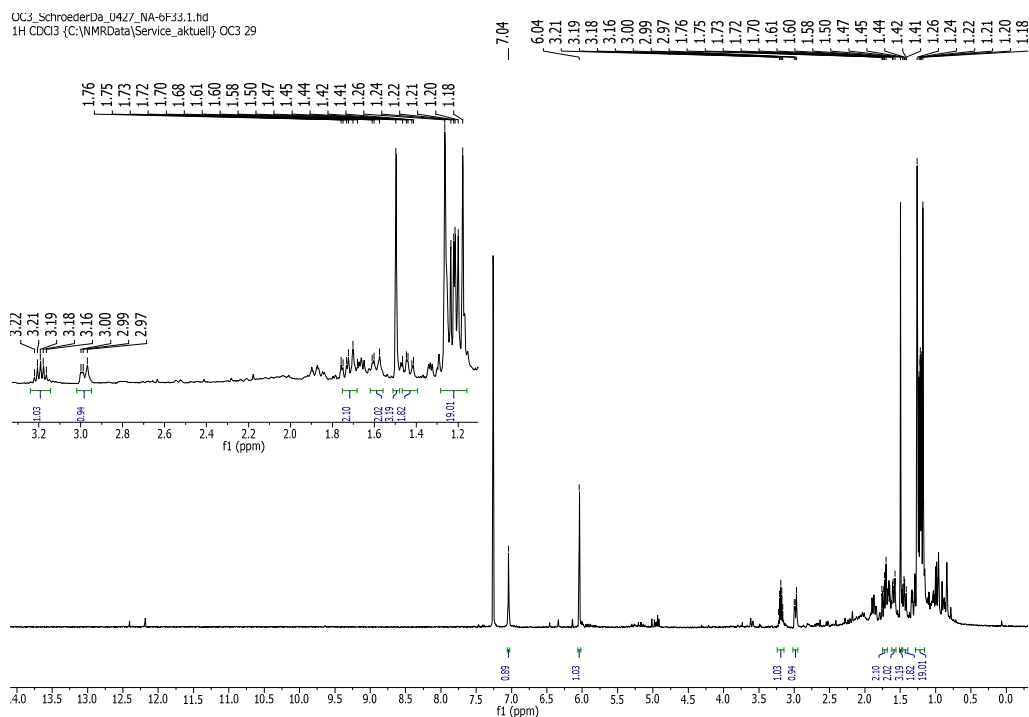

**Figure S15.** The  $^1\text{H}$  NMR of 8 $\alpha$ ,9 $\alpha$ -epoxy-6-deoxycoleon U (3) observed at 500 MHz in  $\text{CDCl}_3$  solution at 25 °C. Assignment is given in Table 1.

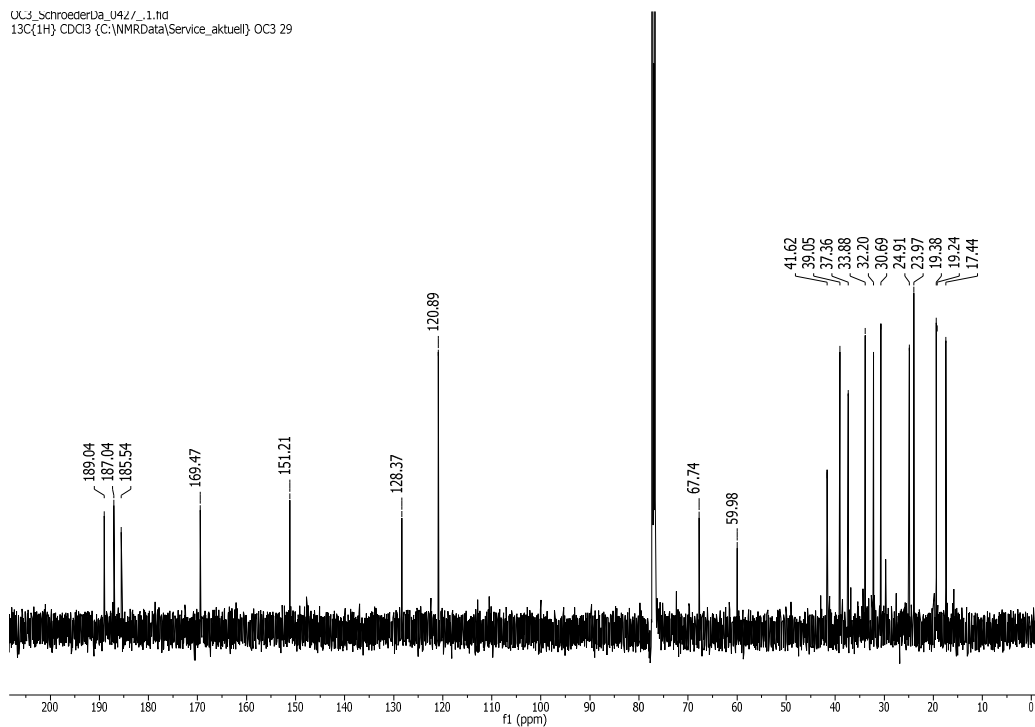

**Figure S16.** The  $^{13}\text{C}$  NMR spectrum of 8 $\alpha$ ,9 $\alpha$ -epoxy-6-deoxycoleon U (3) observed at 125 MHz in  $\text{CDCl}_3$  solution at 25 °C. Assignment is given in Table 1.

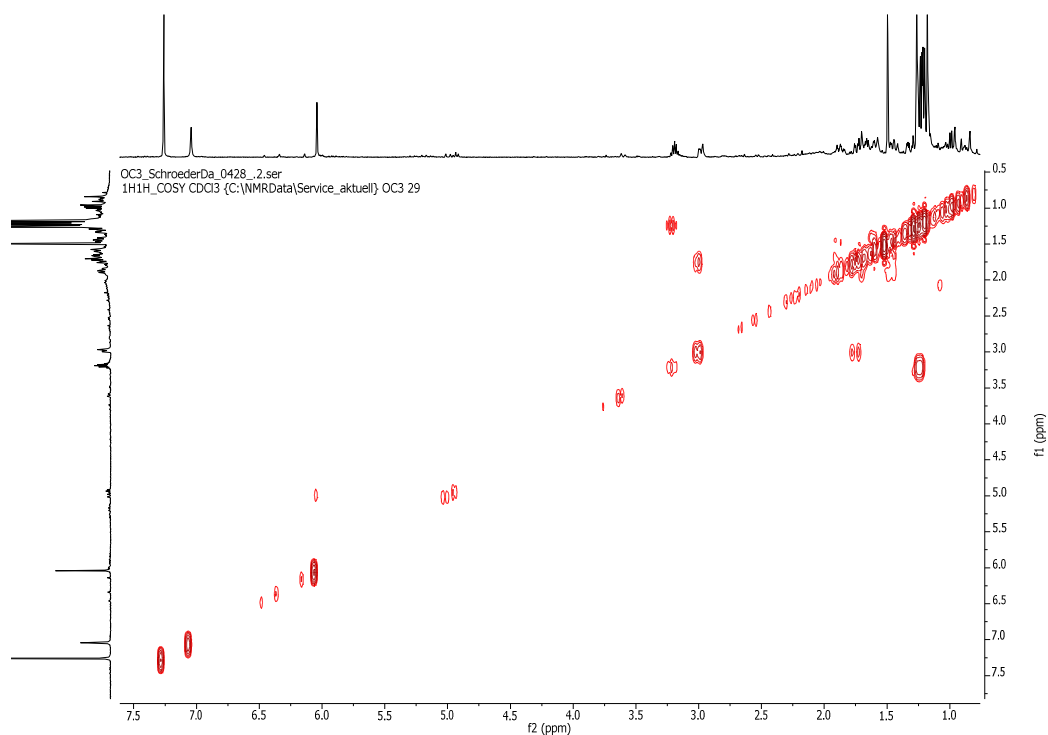

**Figure S17.** The COSY spectrum of 8 $\alpha$ ,9 $\alpha$ -epoxy-6-deoxycoleon U (**3**) observed at 500 MHz in CDCl<sub>3</sub> solution at 25 °C.

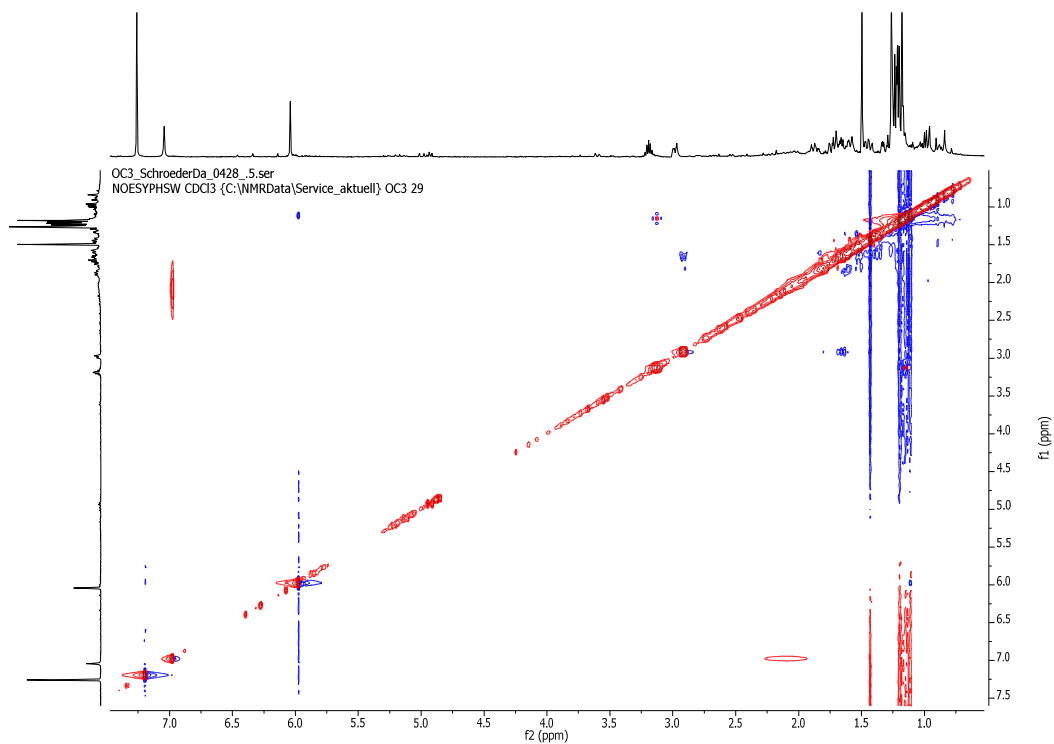

**Figure S18.** The NOESY spectrum of 8 $\alpha$ ,9 $\alpha$ -epoxy-6-deoxycoleon U (**3**) observed at 500 MHz in CDCl<sub>3</sub> solution at 25 °C.

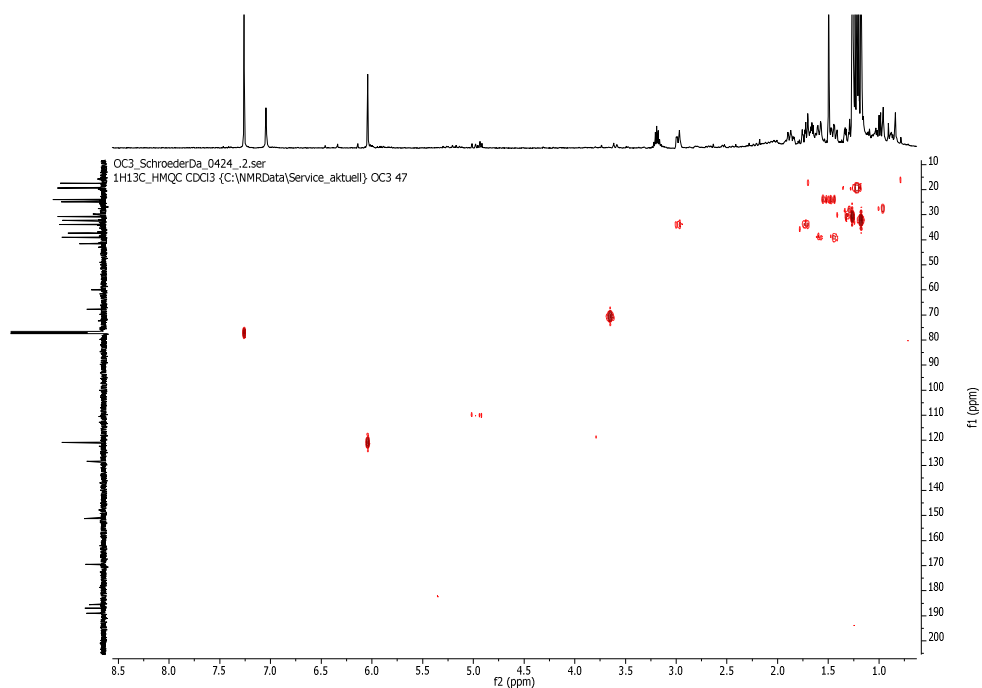

**Figure S19.** The HSQC spectrum of 8 $\alpha$ ,9 $\alpha$ -epoxy-6-deoxycoleon U (**3**) observed at 500 and 125 MHz in CDCl<sub>3</sub> solution at 25 °C.

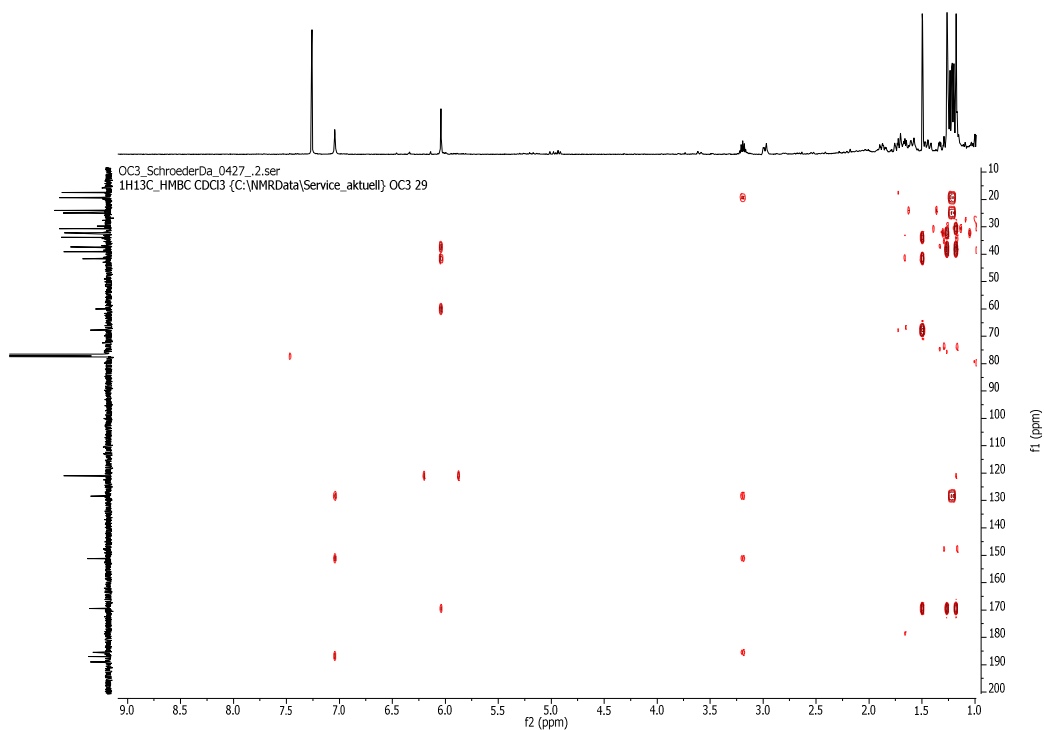

**Figure S20.** The HMBC spectrum of 8 $\alpha$ ,9 $\alpha$ -epoxy-6-deoxycoleon U (**3**) observed at 500 and 125 MHz in CDCl<sub>3</sub> solution at 25 °C.

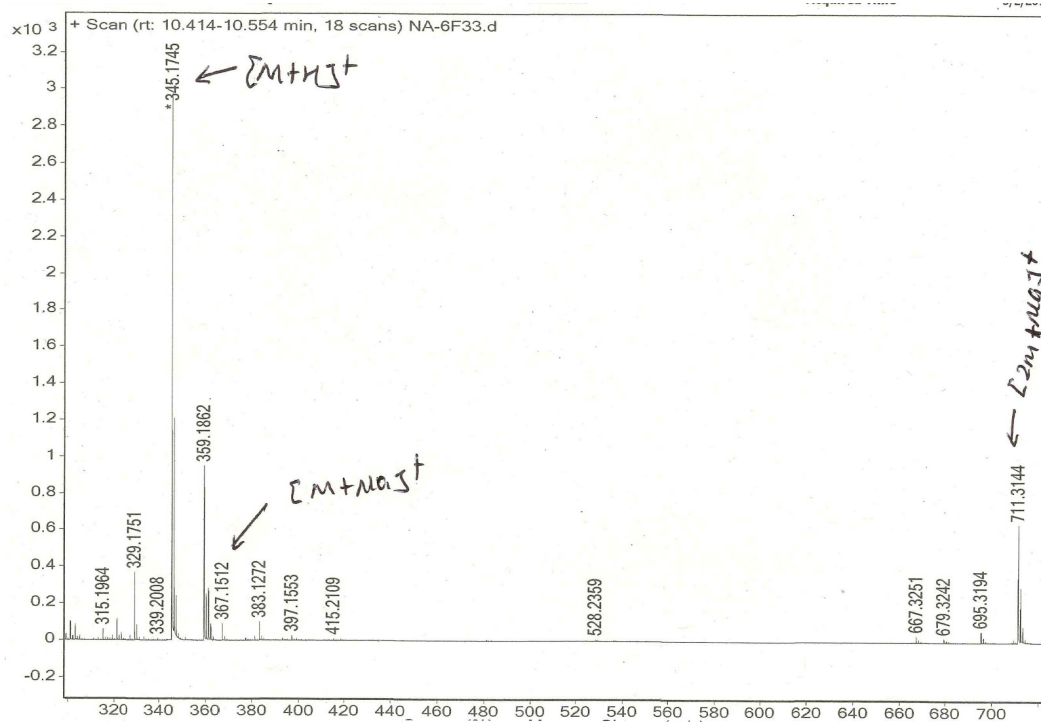

**Figure S21.** The HRESIMS of 8 $\alpha$ ,9 $\alpha$ -epoxy-6-deoxycoleon U (**3**).

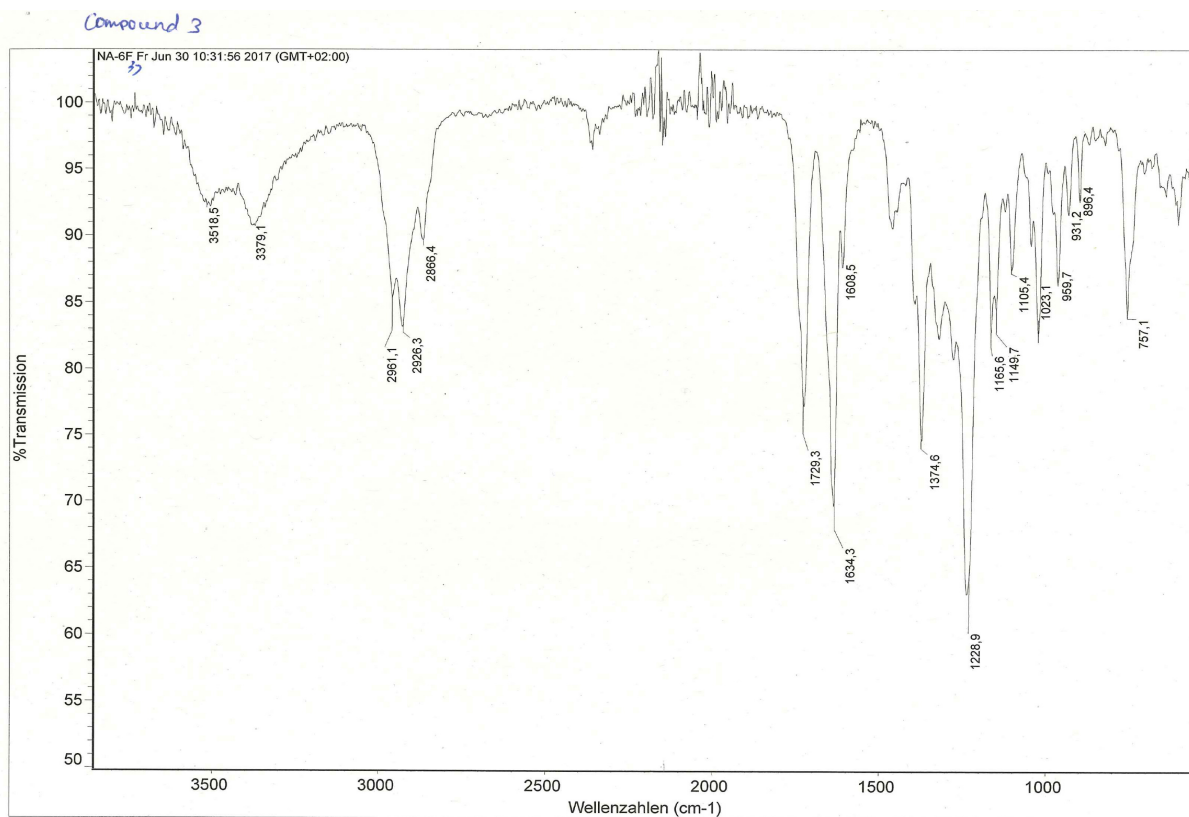

**Figure S22.** The IR spectra of 8 $\alpha$ ,9 $\alpha$ -epoxy-6-deoxycoleon U (**3**).

## Spectroscopic data for 6,12-dihydroxysapriparaquinone (4)

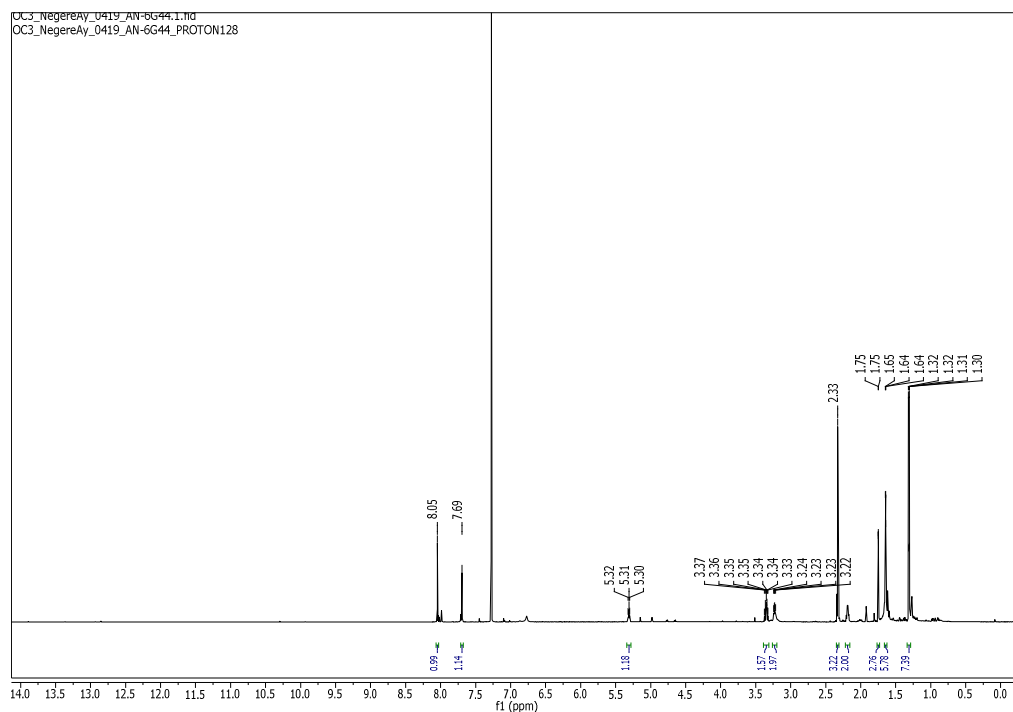

**Figure S23.** The  $^1\text{H}$  NMR of 6,12-dihydroxysapriparaquinone (**4**) observed at 500 MHz in  $\text{CDCl}_3$  solution at 25 °C. Assignment is given in Table 1.

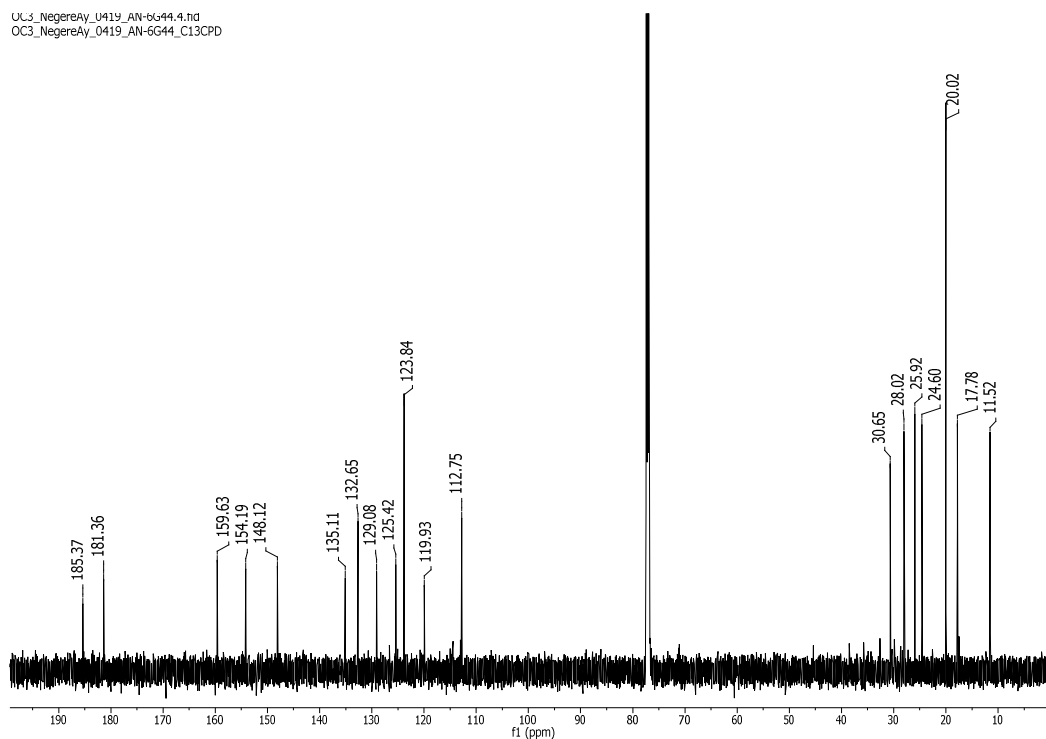

**Figure S24.** The  $^{13}\text{C}$  NMR spectrum 6,12-dihydroxysapriparaquinone (**4**) observed at 125 MHz in  $\text{CDCl}_3$  solution at 25 °C. Assignment is given in Table 1.

OC3\_SchroederDa\_0429\_5.fid  
13C(1H)\_DEPT135 CDCl3 (C:\NMRData\Service\_aktuell)\OC3 43

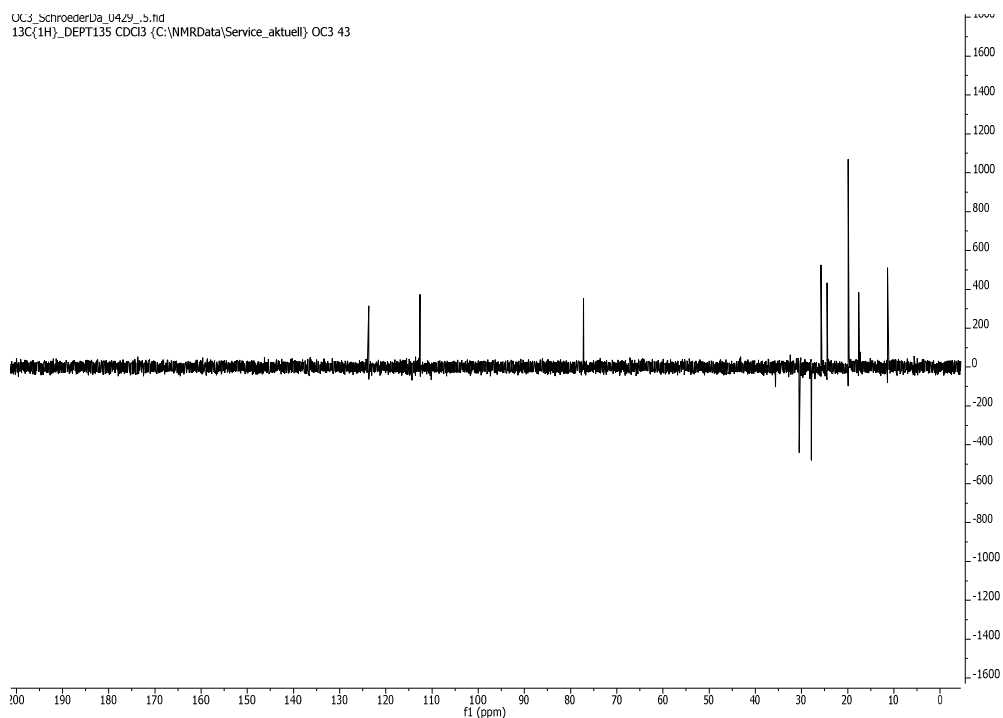

**Figure S25.** The  $^{13}\text{C}$  DEPT NMR spectrum 6,12-dihydroxysapriparaquinone (**4**) observed at 125 MHz in  $\text{CDCl}_3$  solution at 25 °C.

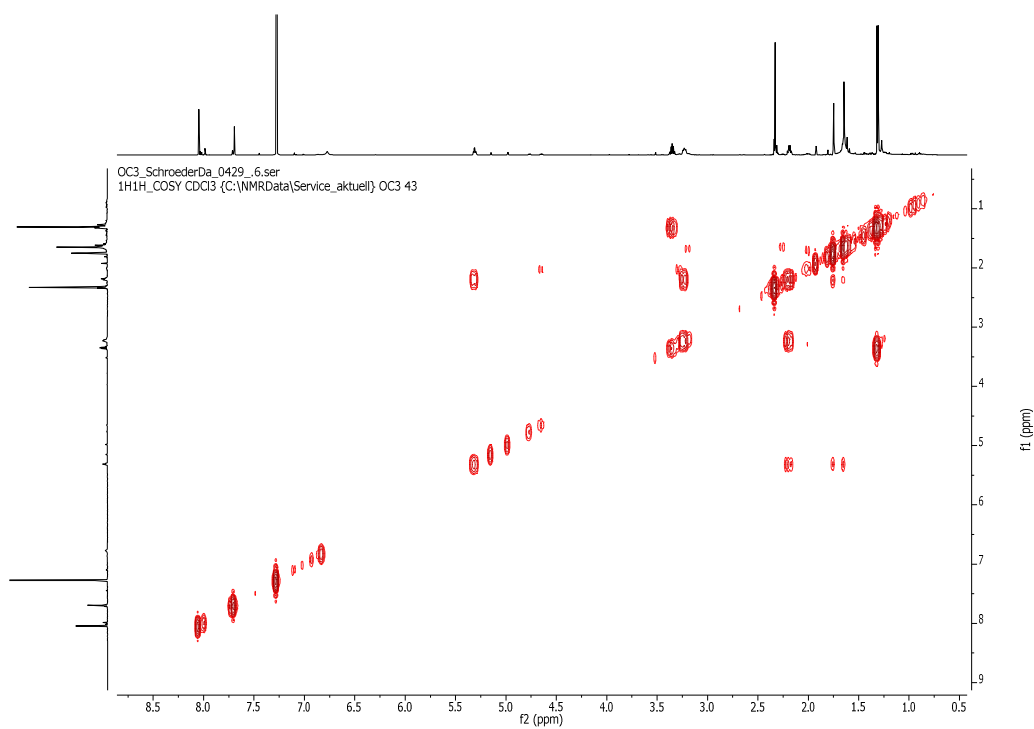

**Figure S26.** The COSY spectrum of 6,12-dihydroxysapriparaquinone (**4**) observed at 500 MHz in  $\text{CDCl}_3$  solution at 25 °C.

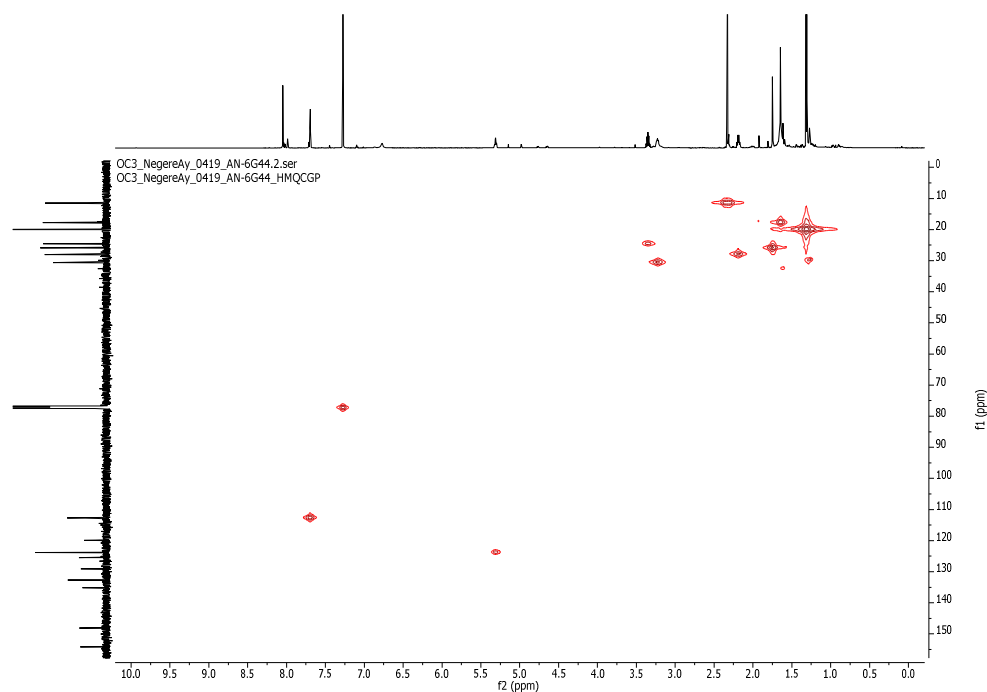

**Figure S27.** The HSQC spectrum of 6,12-dihydroxysapriparaquinone (**4**) observed at 500 and 125 MHz in CDCl<sub>3</sub> solution at 25 °C.

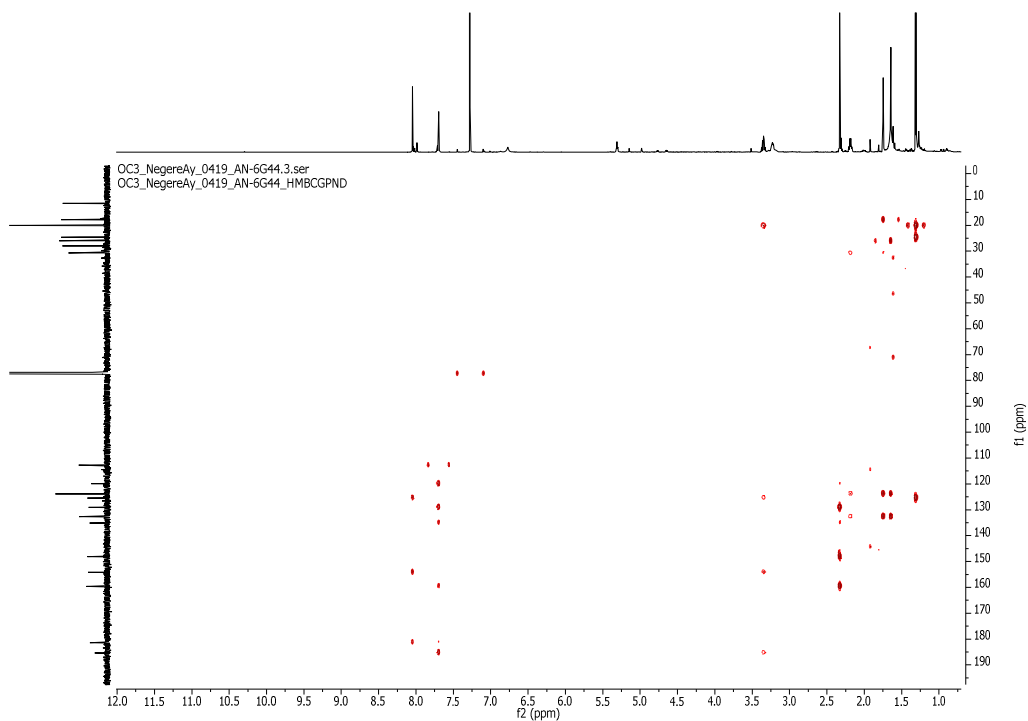

**Figure S28.** The HMBC spectrum of 6,12-dihydroxysapriparaquinone (**4**) observed at 500 and 125 MHz in CDCl<sub>3</sub> solution at 25 °C.

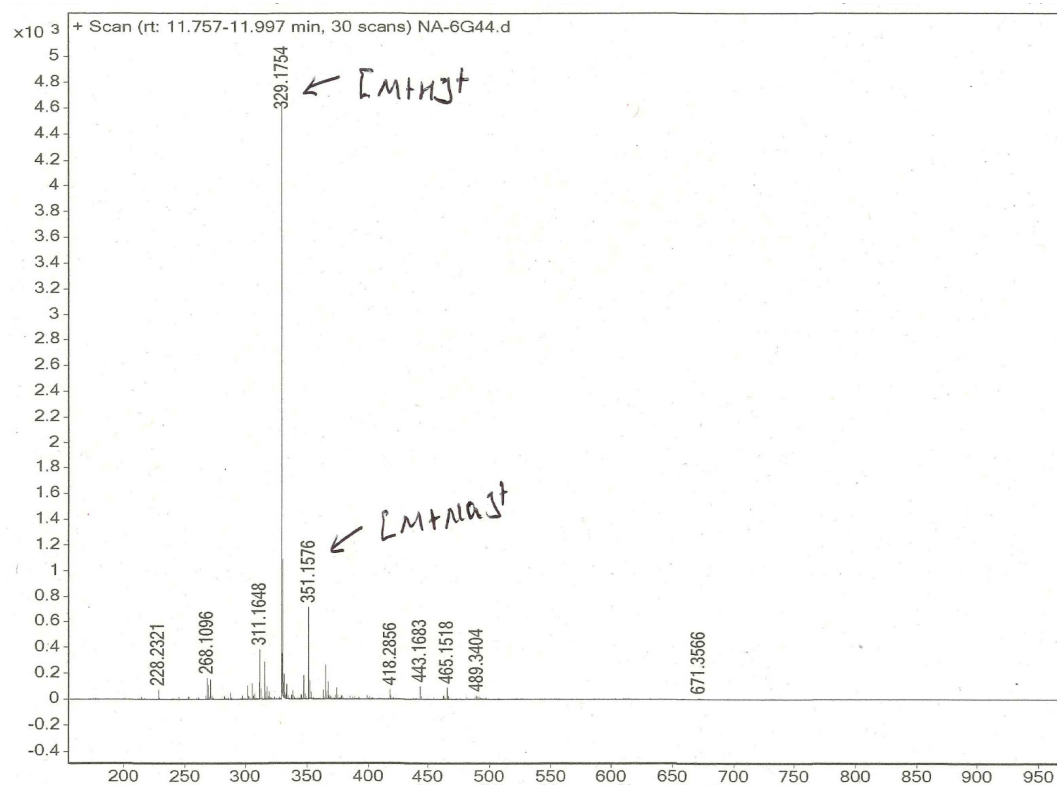

**Figure S29:** HRESIMS spectra of 6,12-dihydroxysapriparaquinone (**4**)
